# Supplementary material
Source: MDPI journal article supplement (https://www.mdpi.com/2076-3263/14/8/211)
Supplement: s1 [file s1]

| Sample | Lab. code | Site                          | Latitude - Longitude   |
|--------|-----------|-------------------------------|------------------------|
| 1      | 1         | La Viste 2019                 | 43°21.441'N 5°21.420'E |
| 2      | TR21-1    | La Viste 2021                 | 43°21.441'N 5°21.420'E |
| 3      | TR21-4    | St Exupéry High school 2021   | 43°20.76'N 5°21.07'E   |
| 4      | TR21-6    | La Calade 2021                | 43°20.44N 5°21'E       |
| 5      | TRA1-a3   | Les Amaryllis                 | 43°18.987'N 5°26.554'E |
| 6      | TRA2-F1   | Les Olives quarry materials   | 43°19.373'N 5°26.982'E |
| 7      | TRA6-O1   | Les Olives. Les Olives avenue | 43°19.498'N 5°26.517'E |

Supplementary File S1. List and location of pollen samples from the Marseille tufa.

| Sample                             | 1   | 2    | 3    | 4   | 5  | 6  | 7     |
|------------------------------------|-----|------|------|-----|----|----|-------|
| <i>Abies</i> sp.                   | 1   | 0    | 0    | 0   | 0  | 0  | 0     |
| <i>Acer</i> sp.                    | 6   | 0    | 0    | 0   | 1  | 0  | 0     |
| <i>Alnus glutinosa</i> t.          | 3   | 1    | 1    | 2   | 1  | 0  | 0     |
| <i>Alnus viridis</i> t.            | 1   | 0    | 0    | 0   | 0  | 0  | 0     |
| <i>Ammi</i> sp.                    | 0   | 1    | 3    | 0   | 0  | 0  | 0     |
| <i>Anthemis</i> sp.                | 0   | 0    | 0    | 0   | 3  | 0  | 0     |
| Apiaceae                           | 2   | 0    | 0    | 1   | 0  | 0  | 0     |
| <i>Artemisia</i> sp.               | 36  | 71   | 14   | 3   | 0  | 0  | 3     |
| <i>Aster</i> t.                    | 2   | 0    | 3    | 3   | 1  | 0  | 0     |
| <i>Atriplex</i> t.                 | 5   | 6    | 10   | 0   | 2  | 0  | 0     |
| <i>Betula</i> sp.                  | 1   | 0    | 1    | 0   | 1  | 0  | 6     |
| <i>Blackstonia</i> t.              | 1   | 0    | 0    | 0   | 0  | 0  | 0     |
| <i>Botryococcus</i>                | 0   | 5    | 0    | 0   | 0  | 0  | 0     |
| <i>Buxus</i> sp.                   | 1   | 0    | 0    | 0   | 0  | 0  | 0     |
| <i>Carduus</i> t.                  | 1   | 0    | 0    | 0   | 0  | 0  | 0     |
| <i>Castanea</i> sp.                | 10  | 0    | 15   | 1   | 0  | 4  | 1     |
| <i>Cedrus</i> sp.                  | 1   | 0    | 0    | 0   | 0  | 0  | 2     |
| <i>Celtis</i> sp.                  | 4   | 0    | 0    | 0   | 0  | 1  | 0     |
| <i>Centaurea cyanus</i> t.         | 1   | 0    | 0    | 0   | 1  | 0  | 0     |
| <i>Centaurea nigra</i> t.          | 0   | 1    | 0    | 0   | 0  | 1  | 0     |
| Cerealial 40 µm                    | 3   | 0    | 1    | 0   | 0  | 0  | 0     |
| Cerealial 42.5 µm                  | 4   | 0    | 0    | 0   | 0  | 0  | 0     |
| Cerealial 45 µm                    | 1   | 0    | 0    | 0   | 0  | 0  | 1     |
| Cerealial 47.5 µm                  | 1   | 1    | 0    | 0   | 0  | 0  | 0     |
| Cerealial 52.5                     | 0   | 1    | 0    | 0   | 0  | 0  | 0     |
| Cerealial 55 µm                    | 1   | 0    | 0    | 0   | 0  | 0  | 0     |
| Cerealial 60 µm                    | 1   | 0    | 0    | 0   | 0  | 0  | 0     |
| Charcoal                           | 588 | 1665 | 1380 | 481 | 84 | 85 | 26950 |
| Chenopodiaceae                     | 7   | 16   | 11   | 1   | 0  | 2  | 1     |
| Chrysophyceae                      | 3   | 6    | 0    | 2   | 0  | 2  | 1     |
| Cichorioideae                      | 5   | 14   | 6    | 0   | 0  | 0  | 2     |
| <i>Cirsium</i> t.                  | 0   | 1    | 0    | 0   | 0  | 0  | 0     |
| <i>Corylus</i> sp.                 | 2   | 0    | 1    | 1   | 0  | 1  | 5     |
| Cyperaceae                         | 2   | 0    | 0    | 4   | 5  | 2  | 0     |
| <i>Delitschia</i> sp.              | 2   | 0    | 0    | 0   | 0  | 0  | 0     |
| <i>Dipsacus</i> sp.                | 0   | 7    | 0    | 0   | 0  | 1  | 0     |
| <i>Draba</i> t.                    | 5   | 7    | 2    | 0   | 0  | 1  | 0     |
| <i>Erica arborea/multiflora</i> t. | 0   | 0    | 1    | 0   | 0  | 0  | 1     |
| <i>Euphorbia</i> sp.               | 3   | 2    | 0    | 0   | 0  | 0  | 0     |
| <i>Fagus</i> sp.                   | 2   | 1    | 2    | 0   | 1  | 0  | 1     |
| <i>Fraxinus</i> sp.                | 10  | 0    | 0    | 2   | 2  | 0  | 0     |
| <i>Galium</i> sp.                  | 3   | 0    | 0    | 0   | 0  | 0  | 0     |
| <i>Geranium</i> sp.                | 0   | 1    | 0    | 1   | 0  | 0  | 0     |
| <i>Glomus</i> sp.                  | 0   | 1    | 3    | 1   | 0  | 0  | 1     |

|                                |     |    |    |    |           |    |    |
|--------------------------------|-----|----|----|----|-----------|----|----|
| HdV20d                         | 1   | 0  | 0  | 0  | 0         | 0  | 0  |
| <i>Hypericum</i> sp.           | 0   | 0  | 0  | 0  | 0         | 0  | 1  |
| <i>Iris</i> sp.                | 0   | 0  | 0  | 0  | 0         | 1  | 0  |
| <i>Juglans</i> sp.             | 1   | 0  | 0  | 0  | 0         | 0  | 1  |
| <i>Juniperus</i> sp.           | 21  | 4  | 14 | 2  | 12        | 14 | 1  |
| Lamiaceae                      | 0   | 1  | 0  | 0  | 0         | 0  | 0  |
| <i>Ligustrum</i> sp.           | 0   | 0  | 0  | 0  | 3         | 1  | 1  |
| <i>Lycopodium selago</i>       | 0   | 0  | 0  | 0  | 1         | 0  | 0  |
| <i>Malva</i> sp.               | 2   | 0  | 0  | 0  | 0         | 0  | 0  |
| <i>Mentha</i> sp.              | 1   | 0  | 0  | 0  | 0         | 0  | 0  |
| Microforaminifera              | 1   | 0  | 0  | 0  | 0         | 0  | 0  |
| <i>Myriophyllum spicatum</i>   | 0   | 0  | 0  | 0  | 0         | 1  | 0  |
| <i>Odontites</i> sp.           | 0   | 0  | 0  | 0  | 1         | 0  | 1  |
| <i>Olea</i> sp.                | 19  | 25 | 6  | 1  | 6         | 6  | 5  |
| <i>Ostrya/Carp. Orient.</i>    | 1   | 0  | 0  | 0  | 0         | 0  | 1  |
| <i>Pedicularis</i> t.          | 1   | 0  | 0  | 0  | 0         | 0  | 0  |
| <i>Picea</i> sp.               | 0   | 0  | 0  | 0  | 0         | 0  | 2  |
| <i>Pinus sylvestris</i> t.     | 56  | 22 | 7  | 9  | 5         | 3  | 2  |
| <i>Pinus mediterranean</i>     | 196 | 77 | 59 | 57 | 37        | 60 | 21 |
| <i>Pinus halepensis</i> t.     | 1   | 0  | 0  | 0  | 0         | 0  | 0  |
| <i>Pistacia</i> sp.            | 0   | 0  | 0  | 0  | 0         | 0  | 3  |
| <i>Plantago coronopus</i>      | 19  | 0  | 0  | 0  | 0         | 1  | 0  |
| <i>Plantago lanceolata</i> t.  | 4   | 1  | 0  | 0  | 0         | 0  | 1  |
| <i>Plantago major-media</i> t. | 0   | 0  | 1  | 0  | 0         | 0  | 0  |
| <i>Platanus</i> sp.            | 5   | 0  | 0  | 1  | <b>30</b> | 4  | 1  |
| Poaceae                        | 33  | 24 | 53 | 12 | 4         | 13 | 13 |
| <i>Populus</i> sp.             | 2   | 0  | 0  | 0  | 2         | 0  | 0  |
| <i>Potentilla</i> sp.          | 0   | 0  | 2  | 0  | 0         | 0  | 0  |
| <i>Prunus</i> t.               | 1   | 2  | 0  | 0  | 0         | 0  | 0  |
| <i>Quercus</i> (deciduous)     | 25  | 37 | 28 | 12 | 13        | 23 | 54 |
| <i>Quercus ilex</i>            | 43  | 7  | 2  | 1  | 14        | 5  | 9  |
| <i>Reseda</i> sp.              | 0   | 1  | 0  | 0  | 0         | 0  | 0  |
| <i>Rumex</i> sp.               | 1   | 1  | 0  | 0  | 0         | 0  | 0  |
| <i>Salix</i> sp.               | 0   | 0  | 0  | 0  | 0         | 0  | 1  |
| <i>Sambucus nigra</i>          | 0   | 0  | 0  | 1  | 0         | 0  | 0  |
| <i>Secale cereale</i>          | 3   | 0  | 0  | 0  | 0         | 0  | 0  |
| <i>Sinapis</i> t.              | 4   | 0  | 0  | 0  | 0         | 0  | 0  |
| <i>Sordaria</i> sp.            | 2   | 0  | 0  | 0  | 0         | 0  | 0  |
| <i>Tilia</i> sp.               | 1   | 0  | 0  | 0  | 0         | 0  | 0  |
| Gymnosperm micro-remain        | 0   | 1  | 1  | 0  | 1         | 0  | 0  |
| <i>Trifolium</i> t.            | 0   | 0  | 0  | 0  | 0         | 2  | 0  |
| Type 200                       | 0   | 0  | 0  | 0  | 0         | 0  | 1  |
| <i>Ulex</i> t.                 | 2   | 0  | 0  | 0  | 0         | 0  | 0  |
| <i>Ulmus</i> sp.               | 0   | 1  | 1  | 1  | 0         | 0  | 0  |
| <i>Urtica</i> sp.              | 0   | 0  | 0  | 0  | 1         | 0  | 0  |
| <i>Valsaria</i> sp.            | 1   | 0  | 0  | 0  | 0         | 0  | 0  |

|                        |      |      |      |     |     |     |       |
|------------------------|------|------|------|-----|-----|-----|-------|
| <i>Viburnum</i> sp.    | 0    | 0    | 0    | 0   | 0   | 0   | 2     |
| <i>Vitis</i> sp.       | 0    | 0    | 4    | 1   | 2   | 0   | 0     |
| Pollen sum with NPP    | 1166 | 2012 | 1632 | 601 | 234 | 234 | 27096 |
| Pollen sum without NPP | 568  | 339  | 248  | 117 | 149 | 147 | 143   |
| NPP sum                | 598  | 1673 | 1384 | 484 | 85  | 87  | 26953 |
| NPP without charcoal   | 10   | 8    | 3    | 3   | 2   | 2   | 2     |
| Weight g               | 112  | 250  | 250  | 250 | 51  | 51  | 52    |
| Total APF              | 33   | 93   | 50   | 11  | 10  | 12  | 468   |
| APF without NPP        | 16   | 16   | 8    | 2   | 6   | 7   | 2     |
| APF Charcoal           | 17   | 78   | 42   | 9   | 3   | 4   | 465   |

Supplementary File S2. Row counting of the Marseille tufa samples. Value in **bold** : over-representation of the pollen of *Platanus* due to the presence of a stem. APF : Absolute Pollen Frequency. NPP : Non Pollen Palynomorphs.

| Method | Climate parameter                            | R <sup>2</sup> | RMSE   |
|--------|----------------------------------------------|----------------|--------|
| MAT    | MAAT (°C)                                    | 0.81           | 2.31   |
|        | MTWA (°C)                                    | 0.82           | 2.41   |
|        | MTCO (°C)                                    | 0.81           | 2.66   |
|        | PANN (mm.year <sup>-1</sup> )                | 0.82           | 142.07 |
|        | P <sub>summer</sub> (mm.year <sup>-1</sup> ) | 0.87           | 46.05  |
|        | P <sub>winter</sub> (mm.year <sup>-1</sup> ) | 0.65           | 69.26  |
| WAPLS  | MAAT (°C)                                    | 0.55           | 3.12   |
|        | MTWA (°C)                                    | 0.57           | 3.2    |
|        | MTCO (°C)                                    | 0.52           | 3.66   |
|        | PANN (mm.year <sup>-1</sup> )                | 0.52           | 195.39 |
|        | P <sub>summer</sub> (mm.year <sup>-1</sup> ) | 0.61           | 69.2   |
|        | P <sub>winter</sub> (mm.year <sup>-1</sup> ) | 0.21           | 88.85  |
| BRT    | MAAT (°C)                                    | 0.89           | 2.05   |
|        | MTWA (°C)                                    | 0.89           | 2.14   |
|        | MTCO (°C)                                    | 0.9            | 2.32   |
|        | PANN (mm.year <sup>-1</sup> )                | 0.89           | 126.63 |
|        | P <sub>summer</sub> (mm.year <sup>-1</sup> ) | 0.92           | 42.46  |
|        | P <sub>winter</sub> (mm.year <sup>-1</sup> ) | 0.78           | 62.63  |
| RF     | MAAT (°C)                                    | 0.67           | 2.63   |
|        | MTWA (°C)                                    | 0.67           | 2.75   |
|        | MTCO (°C)                                    | 0.69           | 2.93   |
|        | PANN (mm.year <sup>-1</sup> )                | 0.65           | 163.76 |
|        | P <sub>summer</sub> (mm.year <sup>-1</sup> ) | 0.75           | 55.01  |
|        | P <sub>winter</sub> (mm.year <sup>-1</sup> ) | 0.43           | 75.18  |
| CAM    | MAAT (°C)                                    | 0.87           | 3.4    |
|        | MTWA (°C)                                    | 0.68           | 2.9    |
|        | MTCO (°C)                                    | 0.86           | 5.5    |
|        | PANN (mm.year <sup>-1</sup> )                | 0.45           | 257    |

Supplementary File S3. Statistical parameters of the Modern Analog Technique (MAT), Weighted Averaging Partial Least Squares regression (WA-PLS), Boosted Regression Trees (BRT), Random Forest (RF) and Climatic Amplitude Method (CAM) methods applied on the European and Mediterranean pollen dataset. Six climatic parameters have been reconstructed: MAAT (mean annual air temperature), MTWA (mean temperature of the warmest month), MTCO (mean temperature of the coldest month), PANN (mean annual precipitation), P<sub>winter</sub> (mean winter precipitation), and P<sub>summer</sub> (mean summer precipitation). The coefficient of determination (R<sup>2</sup>) and the root mean square error (RMSE) for each method are represented.

| Samp<br>le | Z<br>(m) | Thermal<br>treatment (°C) | Declinatio<br>n (°) | Inclinatio<br>n (°) | Reversal<br>Angle (°) | MAD<br>(°) | statisti<br>cs | Interpreta<br>tion |
|------------|----------|---------------------------|---------------------|---------------------|-----------------------|------------|----------------|--------------------|
| TRM<br>47  | 9,3<br>5 | 150                       | 221,2               | 46,4                | 66,7                  |            |                | I                  |
| TRM<br>46  | 9,2      | 150                       | 73,2                | 16,9                | 67,3                  |            |                | I                  |
| TRM<br>45  | 8,9<br>5 | 150                       | 169,9               | 16,0                | 101,6                 |            |                | R                  |
| TRM<br>44  | 8,8<br>5 | stepwise 0-350            | 156,2               | -21,3               | 136,1                 | 10,7       | Kir0           | R                  |
| TRM<br>43  | 8,7      | 150                       | 123,8               | 55,2                | 54,8                  |            |                | I                  |
| TRM<br>42  | 8,3<br>5 | 150                       | 36,2                | 49,4                | 23,5                  |            |                | N                  |
| TRM<br>41  | 8,2      | stepwise 0-350            | 325,3               | -34,9               | 100,8                 | 14,6       | Kir            | R                  |
| TRM<br>40  | 8,0<br>5 | 150                       | 324,3               | -26,7               | 93,2                  |            |                | I                  |
| TRM<br>39  | 7,8<br>5 | 150                       | 279,4               | 31,8                | 58,0                  |            |                | I                  |
| TRM<br>38  | 7,6      | stepwise 0-350            | 253,8               | -24,3               | 118,8                 | 17,2       | Kir0           | R                  |
| TRM<br>37  | 7,4      | 150                       | 148,6               | -4,9                | 118,3                 |            |                | R                  |
| TRM<br>36  | 7,3      | 150                       | 10,9                | 23,6                | 39,1                  |            |                | N                  |
| TRM<br>35  | 7,1      | stepwise 0-350            | 181,2               | -56,2               | 174,2                 | 3,3        | Kir0           | R                  |
| TRM<br>34  | 6,8<br>5 | 150                       | 47,0                | 41,7                | 34,3                  |            |                | N                  |
| TRM<br>33  | 6,7      | 150                       | 45,0                | 44,2                | 31,4                  |            |                | N                  |
| TRM<br>32  | 6,5<br>5 | stepwise 0-350            | 30,7                | 54,7                | 17,5                  | 12,0       | Kir            | N                  |
| TRM<br>31  | 6,4      | 150                       | 38,7                | 33,6                | 37,5                  |            |                | N                  |
| TRM<br>30  | 6,2      | 150                       | 131,0               | -70,0               | 159,2                 |            |                | R                  |
| TRM<br>29  | 5,9<br>5 | stepwise 0-350            | 146,3               | -28,7               | 140,1                 | 5,7        | Kir0           | R                  |
| TRM<br>28  | 5,6      | 150                       | 58,7                | -28,0               | 101,5                 |            |                | R                  |
| TRM<br>27  | 5,4<br>5 | 150                       | 121,7               | 32,4                | 74,6                  |            |                | I                  |
| TRM<br>26  | 5,1<br>5 | stepwise 0-350            | 346,0               | 63,3                | 6,6                   | 5,3        | Kir0           | N                  |
| TRM<br>25  | 4,9      | 150                       | 157,6               | 33,0                | 83,3                  |            |                | I                  |
| TRM<br>24  | 4,7      | 150                       | 107,3               | 39,2                | 63,3                  |            |                | I                  |
| TRM<br>23  | 4,5      | stepwise 0-350            | 137,8               | 40,1                | 72,3                  | 3,8        | Kir0           | I                  |
| TRM<br>22  | 4,3      | 150                       | 137,8               | -38,9               | 145,6                 |            |                | R                  |

|        |          |                |       |       |       |      |      |   |
|--------|----------|----------------|-------|-------|-------|------|------|---|
| TRM 21 | 4,1      | 150            | 141,5 | 19,4  | 93,1  |      |      | I |
| TRM 20 | 3,9      | 150            | 326,5 | -15,6 | 82,0  |      |      | I |
| TRM 19 | 3,7<br>5 | 150            | 213,3 | 49,7  | 65,2  |      |      | I |
| TRM 18 | 3,5<br>5 | stepwise 0-350 | 106,9 | -28,1 | 122,4 | 2,9  | Kir0 | R |
| TRM 17 | 3,4      | 150            | 84,5  | -36,9 | 119,6 |      |      | R |
| TRM 15 | 2,9<br>5 | 150            | 148,1 | -49,0 | 158,1 |      |      | R |
| TRM 14 | 2,8      | stepwise 0-350 | 156,3 | -51,9 | 163,8 | 1,8  | Kir  | R |
| TRM 13 | 2,6      | 150            | 185,1 | -45,9 | 163,6 |      |      | R |
| TRM 12 | 2,4      | 150            | 119,0 | -44,6 | 141,4 |      |      | R |
| TRM 11 | 2,2      | stepwise 0-350 | 169,9 | -46,7 | 163,6 | 5,2  | Kir0 | R |
| TRM 10 | 1,9<br>5 | 150            | 174,6 | 7,1   | 110,8 |      |      | R |
| TRM 9  | 1,7      | 150            | 272,7 | -43,9 | 126,6 |      |      | R |
| TRM 8  | 1,5      | stepwise 0-350 | 242,7 | -54,0 | 147,2 | 12,0 | Kir  | R |
| TRM 7  | 1,4      | 150            | 344,8 | 72,7  | 12,1  |      |      | N |
| TRM 6  | 1,2<br>5 | 150            | 173,5 | -57,7 | 174,6 |      |      | R |
| TRM 5  | 1,0<br>5 | 150            | 198,9 | -55,3 | 168,2 |      |      | R |
| TRM 4  | 0,8<br>5 | 150            | 134,9 | -54,5 | 155,7 |      |      | R |
| TRM 3  | 0,6<br>5 | stepwise 0-350 | 201,2 | -71,3 | 167,6 | 3,7  | Kir0 | R |
| TRM 2  | 0,4<br>5 | 150            | 174,0 | -60,0 | 176,5 |      |      | R |
| TRM 1  | 0,2      | stepwise 0-350 | 169,8 | -58,1 | 173,6 | 13,1 | Kir  | R |

Supplementary File S4 sheet 1 : Paleomagnetic results table of La Viste section (TRM). For samples measured after 150°C heating, the remanence is considered as being stable. For samples subjected to stepwise thermal demagnetization, Kirschvink statistics [105] are deduced from the determination of the stable direction.

| Location                                | Sample | Declination (°) | Inclination (°) | Reversal Angle (°) | MAD (°) | statistics | Interpretation |
|-----------------------------------------|--------|-----------------|-----------------|--------------------|---------|------------|----------------|
| Upper part of the Saint Exupery section | SX14A  | 50,93           | 19,23           | 55,24              | 4,33    | Kir        | I              |
|                                         | SX13A  | 70,67           | 37,85           | 48,35              | 10,78   | Kir0       | I              |
|                                         | SX12A  | 62,18           | 45,78           | 38,23              | 3,59    | Kir0       | N              |
| Lower part of the Saint Exupery section | SX11A  | 50,48           | 7,64            | 65,57              | 8,3     | Kir        | I              |
|                                         | SX10A  | 16,98           | 57,91           | 9,4                | 9,73    | Kir        | N              |
|                                         | SX9A   | 64,72           | 66,9            | 27,02              | 5,02    | Kir        | N              |
|                                         | SX8A   | 82,45           | 65,93           | 33,76              | 4,81    | Kir        | N              |
|                                         | SX7A   | 351,57          | 69,29           | 8,06               | 14,05   | Kir        | N              |
|                                         | SX6A   | 351,12          | 57,22           | 6,55               | 13,8    | Kir        | N              |
|                                         | SX5A   | 122,63          | 62,17           | 48,5               | 4,98    | Kir        | N              |
|                                         | SX4A   | 71,98           | 67,01           | 29,6               | 10,56   | Kir        | N              |
|                                         | SX3A   | 13,65           | 63,87           | 6,47               | 11,16   | Kir        | N              |
| Carrefour Market section                | SX2A   | 5,44            | 50,72           | 11,66              | 18,26   | Kir        | N              |
|                                         | SX1A   | 13,7            | 45,39           | 18,39              | 11,71   | Kir        | N              |
|                                         | CAM8A  | 181,89          | -51,63          | 169,58             | 4,51    | Kir        | R              |
|                                         | CAM7A  | 133,88          | 6,21            | 103,18             | 5,14    | Kir0       | R              |
|                                         | CAM6A  | 194,59          | -40,85          | 157,1              | 23,37   | Kir        | R              |
|                                         | CAM5A  | 183,31          | -43,44          | 161,33             | 9,57    | Kir        | R              |
|                                         | CAM4B  | 154,22          | -40,67          | 153,64             | 6,36    | Kir0       | R              |
|                                         | CAM3A  | 138,21          | -28,8           | 137,07             | 2,73    | Kir        | R              |
|                                         | CAM2A  | 115,3           | -77,69          | 154,88             | 4,05    | Kir        | R              |
| Upper part of the Calade section        | CAM1A  | 150,51          | -17,7           | 131,13             | 8,53    | Kir0       | R              |
|                                         | CAL9A  | 350,54          | 21,79           | 40,73              | 6,94    | Kir        | N              |
|                                         | CAL8A  | 332,14          | 30,77           | 36,07              | 9,60    | Kir0       | N              |
| Lower part of the Calade section        | CAL10A | 178,33          | 55,94           | 62,05              | 10,07   | Kir        | I              |
|                                         | CAL7A  | 350,47          | 39,62           | 23,12              | 19,99   | Kir        | N              |
|                                         | CAL6B  | 149,38          | 36,28           | 78,65              | 12,06   | Kir0       | R              |
|                                         | CAL5B  | 110,12          | -8,11           | 106,53             | 8,50    | Kir0       | R              |
|                                         | CAL4A  | 298,66          | 82,21           | 25,13              | 6,99    | Kir        | N              |
|                                         | CAL3A  | 274,81          | 67,87           | 33,62              | 5,38    | Kir        | N              |
|                                         | CAL2A  | 157,64          | 32,53           | 83,76              | 8,42    | Kir        | I              |
|                                         | CAL1A  | 210,60          | 76,16           | 40,48              | 8,06    | Kir        | N              |

Supplementary File 4., sheet2. Paleomagnetic results table for Saint Exupéry (SX), Carrefour Market (CAM) and Calade (CAL) sections. Kirschvink statistics [102] are deduced from the determination of the stable direction determined from alternating field stepwise demagnetization patterns.

The reversal angle is the calculated angle between the expected orientation of the geomagnetic field at site latitude for normal polarity (63° towards N000) and the stable magnetization deduced from the paleomagnetic investigations.

N= normal polarity, R=reverse polarity, I= intermediate polarity



| Locality                         | Sample | d18O         | d13C         |
|----------------------------------|--------|--------------|--------------|
|                                  |        | Mean         | Mean         |
|                                  |        | permil V-PDB | permil V-PDB |
| LES AYGALES                      | A1a    | -5,99        | -9,28        |
|                                  | A1b    | -6,28        | -9,37        |
|                                  | A2     | -6,06        | -9,47        |
|                                  | A3     | -5,98        | -9,06        |
|                                  | A5     | -6,10        | -8,99        |
|                                  | A6     | -5,89        | -9,42        |
|                                  | A7     | -5,97        | -9,10        |
| SAINT-EXUPERY HIGH SCHOOL        | G-1    | -6,29        | -9,09        |
|                                  | G-2    | -6,36        | -9,82        |
|                                  | G-3    | -5,89        | -9,22        |
|                                  | G-4    | -5,59        | -8,94        |
| LA CALADE                        | CAL-C1 | -5,92        | -8,81        |
|                                  | CAL-C2 | -6,42        | -9,01        |
| LA VALENTINE (BAOU DE ST MARCEL) | 1      | -6,76        | -8,09        |
|                                  | 2A     | -6,28        | -7,95        |
|                                  | 5A     | -6,72        | -7,15        |
|                                  | 5B     | -7,08        | -8,02        |
|                                  | 5C     | -6,57        | -8,15        |
|                                  | 5D     | -5,24        | -6,25        |
|                                  | 5E     | -6,59        | -6,97        |
|                                  | 5G     | -6,94        | -8,16        |
|                                  | 6 A    | -7,15        | -8,54        |
|                                  | 6 C    | -6,99        | -8,13        |
|                                  | 8 A    | -5,84        | -9,06        |
|                                  | 8 B    | -6,30        | -8,14        |
|                                  | 8 C    | -4,03        | -4,10        |
|                                  | 8 D    | -4,56        | -2,89        |
|                                  | 8 E    | -5,96        | -7,50        |
|                                  | 8 F    | -4,98        | -9,19        |
|                                  | 9 A    | -7,09        | -8,40        |
|                                  | 9 B    | -6,69        | -7,30        |
|                                  | 9 C    | -6,52        | -7,02        |

Supplementary File S5. Carbon and oxygen isotope composition of bulk carbonates : lower Pleistocene calcareous tufas from the Marseille Basin (see Figure 1 for location of sampling localities)

| Group                 | Taxa                                                                                                                                                                                                                                                                                                                       | Group                 | Taxa                                                                                                                                                                                                                                                                               |
|-----------------------|----------------------------------------------------------------------------------------------------------------------------------------------------------------------------------------------------------------------------------------------------------------------------------------------------------------------------|-----------------------|------------------------------------------------------------------------------------------------------------------------------------------------------------------------------------------------------------------------------------------------------------------------------------|
| Aquatics-Hygrophilous | <i>Botryococcus</i><br>Chrysophyceae<br><i>Iris</i><br><i>Mentha</i><br><i>Myriophyllum spicatum</i>                                                                                                                                                                                                                       | <i>Pinus</i> sum      | <i>P. halepensis</i><br>Mediterranean P.<br><i>P. sylvestris</i>                                                                                                                                                                                                                   |
| Cerealialia           | Cerealialia 40-60 µm<br><i>Secale</i>                                                                                                                                                                                                                                                                                      | <i>Quercus</i> forest | <i>Acer</i><br><i>Buxux</i><br><i>Celtis</i><br><i>Corylus</i><br><i>Ligustrum</i><br><i>Olea</i><br><i>Pistacia</i><br><i>Prunus</i><br>Deciduous Q.<br><i>Q. ilex</i><br><i>Sambucus nigra</i><br><i>Tilia</i><br><i>Ulex</i><br><i>Ulmus</i><br><i>Viburnum</i><br><i>Vitis</i> |
| Chenopodiaceae        | <i>Atriplex</i><br>Chenopodiaceae                                                                                                                                                                                                                                                                                          |                       |                                                                                                                                                                                                                                                                                    |
| Coprophilous          | <i>Delitschia</i><br><i>Glomus</i><br>HdV20d<br><i>Sordaria</i><br><i>Valsaria</i><br>Type 200                                                                                                                                                                                                                             |                       |                                                                                                                                                                                                                                                                                    |
| Nitrophilous          | <i>Ammi</i><br><i>Anthemis</i><br><i>Artemisia</i><br><i>Aster</i><br><i>Atriplex</i><br><i>Carduus</i><br><i>Centaurea cyanus</i><br><i>Centaurea nigra</i><br>Chenopodiaceae<br>Cichorioideae<br><i>Cirsium</i><br><i>Plantago coronopus</i><br><i>P. lanceolata</i><br><i>P. major</i><br><i>Rumex</i><br><i>Urtica</i> | Riverine forest       | <i>Alnus glutinosa</i><br><i>Corylus</i><br><i>Fraxinus</i><br><i>Juglans</i><br><i>Platanus</i><br><i>Populus</i><br><i>Salix</i>                                                                                                                                                 |
|                       |                                                                                                                                                                                                                                                                                                                            | Steppics              | <i>Anthemis</i><br><i>Artemisia</i><br><i>Aster</i><br><i>Centaurea cyanus</i><br><i>Centaurea nigra</i><br>Chenopodiaceae sum<br>Cichorioideae<br><i>Cirsium</i>                                                                                                                  |

Supplementary File S6. Ecological classification of pollen taxa used to draw pollen diagrams.

| Taxa                        | Family         | Edible organ        | Tree | Herb | Vegetable | Fruit | Seed | Underground organ | Other |
|-----------------------------|----------------|---------------------|------|------|-----------|-------|------|-------------------|-------|
| <i>Abies</i> sp.            | Pinaceae       | Inner bark          | 1    |      |           |       |      |                   | 1     |
| <i>Ammi</i> t.              | Apiaceae       | Seed                |      | 1    |           |       | 1    |                   |       |
| <i>Anthemis</i>             | Compositae     | Leaf, stem          |      | 1    | 2         |       |      |                   |       |
| Apiaceae                    | Apiaceae       | Leaf, stem, root    |      | 1    | 2         |       |      | 1                 |       |
| <i>Artemisia</i> sp.        | Compositae     | Leaf, shoot         |      | 1    | 2         |       |      |                   |       |
| <i>Asphodelus</i> sp.       | Liliaceae      | All                 |      | 1    | 1         | 1     | 1    | 1                 | 1     |
| <i>Aster</i> t.             | Compositae     | Leaf, stem          |      | 1    | 2         |       |      |                   |       |
| <i>Atriplex</i> t.          | Chenopodiaceae | All                 |      | 1    | 1         | 1     | 1    | 1                 | 1     |
| <i>Betula</i> sp.           | Betulaceae     | Leaf, bark, sap     | 1    |      | 1         |       |      |                   | 2     |
| <i>Carduus</i> t.           | Compositae     | Leaf                |      | 1    | 1         |       |      |                   |       |
| <i>Castanea</i> sp.         | Fagaceae       | Fruit               | 1    |      |           | 1     |      |                   |       |
| <i>*Celtis australis</i>    | Cannabaceae    | Fruit, seed         | 1    |      |           | 1     | 1    |                   |       |
| <i>Celtis</i> sp.           | Cannabaceae    | Fruit, seed         | 1    |      |           | 1     | 1    |                   |       |
| <i>Centaurea cyanus</i>     | Compositae     | Flower              |      | 1    | 1         |       |      |                   |       |
| <i>Centaurea nigra</i> t.   | Compositae     | Flower              |      | 1    | 1         |       |      |                   |       |
| <i>Centranthus</i> t.       | Valerianaceae  | Leaf, flower        |      | 1    | 2         |       |      |                   |       |
| <i>*Cercis siliquastrum</i> | Fabaceae       | Flower, young shoot |      | 1    | 1         |       |      |                   |       |
| Cerealial 40 µm             | Poaceae        | Seed                |      | 1    |           |       | 1    |                   |       |
| Cerealial 42,5 µm           | Poaceae        | Seed                |      | 1    |           |       | 1    |                   |       |
| Cerealial 45 µm             | Poaceae        | Seed                |      | 1    |           |       | 1    |                   |       |
| Cerealial 47,5 µm           | Poaceae        | Seed                |      | 1    |           |       | 1    |                   |       |
| Cerealial 52,5 µm           | Poaceae        | Seed                |      | 1    |           |       | 1    |                   |       |
| Cerealial 55 µm             | Poaceae        | Seed                |      | 1    |           |       | 1    |                   |       |
| Cerealial 60 µm             | Poaceae        | Seed                |      | 1    |           |       | 1    |                   |       |
| <i>Chamaerops humilis</i>   | Arecaceae      | Fruit               |      |      |           | 1     |      |                   |       |
| Chenopodiaceae              | Chenopodiaceae | Leaf                |      | 1    | 1         |       |      |                   |       |
| Cichorioideae               | Cichorioideae  | Flower, leaf, stem  |      | 1    | 3         |       |      |                   |       |
| <i>Cirsium</i> sp.          | Compositae     | Flower, leaf, stem  |      | 1    | 3         |       |      |                   |       |
| <i>*Cornus sanguinea</i>    | Cornaceae      | Fruit               | 1    |      |           | 1     |      |                   |       |
| <i>Corylus</i> sp.          | Betulaceae     | Seed                | 1    |      |           |       | 1    |                   |       |
| <i>*Corylus avellana</i>    | Betulaceae     | Seed                | 1    |      |           |       | 1    |                   |       |
| <i>*Crataegus oxycantha</i> | Rosaceae       | Young leaf, fruit   | 1    |      | 1         | 1     |      |                   |       |
| Cyperaceae                  | Cyperaceae     | Root                |      | 1    |           |       |      | 1                 |       |
| <i>Draba</i> t.             | Brassicaceae   | Leaf, stem          |      | 1    | 2         |       |      |                   |       |
| <i>Fagus</i> sp.            | Fagaceae       | Seed                | 1    |      |           |       | 1    |                   |       |
| <i>*Ficus carica</i>        | Moraceae       | Fruit               | 1    |      |           | 1     |      |                   |       |
| <i>Fraxinus</i> sp.         | Oleaceae       | Leaf                | 1    |      | 1         |       |      |                   |       |
| <i>Galium</i> sp.           | Rubiaceae      | Leaf                |      | 1    | 1         |       |      |                   |       |
| <i>Geranium</i> sp.         | Geraniceae     | Leaf                |      | 1    | 1         |       |      |                   |       |
| <i>Juglans</i> sp.          | Juglandaceae   | Seed                | 1    |      |           |       | 1    |                   |       |

|                                               |                 |                             |   |   |   |   |   |   |   |
|-----------------------------------------------|-----------------|-----------------------------|---|---|---|---|---|---|---|
| <i>Juniperus</i> sp.                          | Cupressaceae    | Fruit                       | 1 |   |   | 1 |   |   |   |
| Lamiaceae                                     | Lamiaceae       | All                         |   | 1 | 1 | 1 | 1 | 1 | 1 |
| * <i>Malus acerba</i>                         | Rosaceae        | Fruit                       | 1 |   |   | 1 |   |   |   |
| <i>Mentha</i> t.                              | Lamiaceae       | Leaf                        |   | 1 | 1 |   |   |   |   |
| <i>Myriophyllum spicatum</i>                  | Haloragaceae    | Root                        |   | 1 | 1 |   |   |   |   |
| <i>Olea</i> sp.                               | Oleaceae        | Fruit                       | 1 |   |   | 1 |   |   |   |
| <i>Picea</i> sp.                              | Pinaceae        | Bud                         | 1 |   | 1 |   |   |   |   |
| <i>Pinus halepensis</i> t.                    | Pinaceae        | Seed, young shoot           | 1 |   | 1 |   |   |   |   |
| <i>Pinus</i> (mediterranean)                  | Pinaceae        | Seed, young shoot           | 1 |   | 1 |   |   |   |   |
| * <i>Pinus nigra</i> subsp. <i>salzmannii</i> | Pinaceae        | Seed, young shoot           | 1 |   | 1 |   |   |   |   |
| * <i>Pinus pyrenaica</i>                      | Pinaceae        | Seed, young shoot           | 1 |   | 1 |   |   |   |   |
| <i>Pinus sylvestris</i> t.                    | Pinaceae        | Seed, young shoot           | 1 |   | 1 |   | 1 |   |   |
| <i>Pistacia</i> sp.                           | Anacardiaceae   | Fruit, resin                | 1 |   |   | 1 |   |   | 1 |
| <i>Plantago coronopus</i> t.                  | Plantaginaceae  | Young leaf                  |   | 1 | 1 |   |   |   |   |
| <i>Plantago lanceolata</i> t.                 | Plantaginaceae  | Young leaf                  |   | 1 | 1 |   |   |   |   |
| <i>Plantago major-media</i> t.                | Plantaginaceae  | Young leaf                  |   | 1 | 1 |   |   |   |   |
| Poaceae                                       | Poaceae         | Young shoot, leaf           |   | 1 | 2 |   |   |   |   |
| * <i>Populus alba</i>                         | Salicaceae      | Sap, young shoot, bud, bark | 1 |   | 3 |   |   |   | 1 |
| <i>Populus nigra</i>                          | Salicaceae      | Sap, young shoot, bud, bark | 1 |   | 3 |   |   |   |   |
| <i>Populus</i> sp.                            | Salicaceae      | Sap, young shoot, bud, bark | 1 |   | 3 |   |   |   | 1 |
| <i>Potentilla</i> t.                          | Rosaceae        | All                         |   | 1 | 1 | 1 | 1 | 1 | 1 |
| <i>Prunus</i> t.                              | Rosaceae        | Fruit                       | 1 |   |   | 1 |   |   |   |
| <i>Quercus</i> (deciduous)                    | Fagaceae        | Fruit                       | 1 |   |   | 1 |   |   |   |
| <i>Quercus ilex</i> t.                        | Fagaceae        | Fruit                       | 1 |   |   | 1 |   |   |   |
| * <i>Quercus pubescens</i>                    | Fagaceae        | Fruit                       | 1 |   |   | 1 |   |   |   |
| <i>Reseda</i> sp.                             | Resedaceae      | Leaf, young shoot           |   | 1 | 2 |   |   |   |   |
| * <i>Ribes</i> sp.                            | Grossulariaceae | Fruit                       |   |   |   | 1 |   |   |   |
| * <i>Rubus idaeus</i>                         | Rosaceae        | Fruit                       | 1 |   |   | 1 |   |   |   |
| <i>Rumex</i> sp.                              | Polygonaceae    | Leaf, stem                  |   | 1 | 2 |   |   |   |   |
| <i>Salix</i> sp.                              | Salicaceae      | Leaf, young shoot           | 1 |   | 2 |   |   |   |   |
| * <i>Salix viminalis</i>                      | Salicaceae      | Leaf, young shoot           | 1 |   | 2 |   |   |   |   |

|                                                    |                |                          |      |      |      |    |      |     |
|----------------------------------------------------|----------------|--------------------------|------|------|------|----|------|-----|
| <i>Sambucus nigra</i>                              | Caprifoliaceae | Fruit                    | 1    |      | 1    |    |      |     |
| <i>Secale</i> sp.                                  | Poaceae        | Seed                     |      | 1    |      |    | 1    |     |
| <i>Sinapis</i> t.                                  | Brassicaceae   | Seed, leaf, bark         |      | 1    | 2    |    |      |     |
| <i>*Tilia europaea</i>                             | Tiliaceae      | Young leaf, flower       | 1    |      | 3    |    |      |     |
| <i>Tilia</i> sp.                                   | Tiliaceae      | Young leaf, flower, bark | 1    |      | 3    |    |      |     |
| <i>Trifolium</i> t.                                | Fabaceae       | Flower, leaf             |      | 1    | 2    |    |      |     |
| <i>Ulex</i> t.                                     | Fabaceae       | Leaf, stem               |      | 1    | 2    |    |      |     |
| <i>Ulmus</i> sp.                                   | Ulmaceae       | Leaf                     | 1    |      | 1    |    |      |     |
| <i>Urtica</i> sp.                                  | Urticaceae     | Leaf, stem               |      | 1    | 2    |    |      |     |
| <i>Vitis</i> sp.                                   | Vitaceae       | Fruit, leaf              | 1    |      | 1    | 1  |      |     |
| <i>*Vitis vinifera</i><br><i>subsp. sylvestris</i> | Vitaceae       | Fruit, leaf              | 1    |      | 1    | 1  |      |     |
| Sum of tree & herb                                 |                |                          | 37   | 41   |      |    |      |     |
| % of tree & herb                                   |                |                          | 47,4 | 52,6 |      |    |      |     |
| Sum of biological organ                            |                |                          |      |      | 74   | 21 | 20   | 6   |
| % of biological organ                              |                |                          |      |      | 56,5 | 16 | 15,3 | 4,6 |

Supplementary File S7. List of edible plants from the Marseille tufa.
